# Supplementary material for: Effects of Center-Based Delivery of Tai Chi and Qi Gong Group Classes on Self-Reported Symptoms in Cancer Patients and Caregivers
Source: PubMed Central journal article supplement — Integr Cancer Ther. 2020 Jul 19;19:1534735420941605. doi: 10.1177/1534735420941605 (PMC7374530; doi:10.1177/1534735420941605), 2020-07-19
Supplement: Supplement_A_Tai_chi_Curriculum_1.pdf [file Supplement_A_Tai_chi_Curriculum_1.pdf]

**Warm-up with deep breathing and gentle head-to toe movement.**

(Note: Exercises may be done sitting if preferred.)

- Deep breathing
- Gentle body stretch/rotation
- Neck stretch
- Shoulder rotation
- Wrist rotation
- Upper/lower arm stretch
- Waist/hip rotation
- Knee rotation
- Ankle rotation

**24 Form Yang-style Tai chi exercise**

Includes a series of postures designed to synchronize breath and movements. Examples include:

- Commencing form
- Part the wild horse's mane
- White crane spreads its wings
- Brush knee and step forward
- Play the lute
- Repulse the monkey behind you
- Grasp sparrow's tail (left)
- Grasp sparrow's tail (right)
- Single whip
- Pat the horse's head
- Right heel kick
- Strike ears with both fists
- Turn, left heel kick
- Snake creeps down (left)
- Golden rooster stands on one leg (left)
- Snake creeps down (right)
- Golden rooster stands on one leg (right)
- Fair lady works at shuttles
- Needle at the bottom of the sea
- Fan through back
- Turn body, deflect, parry and punch
- Beginning closure
- Cross closure
- Close form

**Cool down with guided relaxation exercise**
