# Supplementary material for: Effects of Center-Based Delivery of Tai Chi and Qi Gong Group Classes on Self-Reported Symptoms in Cancer Patients and Caregivers
Source: PubMed Central journal article supplement — Integr Cancer Ther. 2020 Jul 19;19:1534735420941605. doi: 10.1177/1534735420941605 (PMC7374530; doi:10.1177/1534735420941605), 2020-07-19
Supplement: Supplement_B_Qi_gong_Curriculum_1.pdf [file Supplement_B_Qi_gong_Curriculum_1.pdf]

**Warm-up with deep breathing and gentle head-to toe movement.**

(Note: Exercises may be done sitting if preferred.)

- Deep breathing
- Gentle body stretch/rotation
- Neck stretch
- Shoulder rotation
- Wrist rotation
- Upper/lower arm stretch
- Waist/hip rotation
- Knee rotation
- Ankle rotation

**8 Brocades Qi gong exercise**

Includes a series of postures designed to synchronize breath and movements. Examples include:

- Two hands hold up the heavens
- Separate heaven and earth
- Draw the bow
- Wise owl looks backwards
- Sway the head and shake the tail
- Two hands balance Yin and Yang
- Clench fists with fierceness
- Bounce on toes

**Cool down with guided relaxation exercise**
